# Supplementary material for: Modeling cell line-specific recruitment of signaling proteins to the insulin-like growth factor 1 receptor
Source: PLoS Comput Biol. 2019 Jan 17;15(1):e1006706. doi: 10.1371/journal.pcbi.1006706 (PMC6353226; doi:10.1371/journal.pcbi.1006706)
Supplement: S2 Table — This table summarizes equilibrium dissociation constant values reported in the literature [45,46,89] and used in this study. (XLSX) [file pcbi.1006706.s005.xlsx]

## Sheet: S2 Table
S2 Table. Dissociation constants for SH2/PTB domain containing proteins
Protein	Binding Domain	Phosphotyrosine	KD (uM)	Reference
ABL2	SH2	pY1346	1.364	Gordus et al, 2009 Mol Sys Biol
ABL2	SH2	pY973	0.048	Gordus et al, 2009 Mol Sys Biol
BLK	SH2	pY1161	1.795	Gordus et al, 2009 Mol Sys Biol
CRKL	SH2	pY973	1.863	Gordus et al, 2009 Mol Sys Biol
CRKL	SH2	pY1166	1.83	Gordus et al, 2009 Mol Sys Biol
IRS1	PTB	pY980	19.12	calculated as ratio of INSR binding affinity of IRS1 to that of SHC1, Farooq et al, 1999 J Biol Chem
ITK	SH2	pY1161	1.516	Gordus et al, 2009 Mol Sys Biol
NCK2	SH2	pY973	0.349	Gordus et al, 2009 Mol Sys Biol
PIK3R1	SH2	pY1346	0.5632	Koytiger et al, 2013 Mol & Cell Proteomics
PIK3R2	SH2	pY1346	0.599	Koytiger et al, 2013 Mol & Cell Proteomics
PIK3R3	SH2	pY1161	0.6255	Koytiger et al, 2013 Mol & Cell Proteomics
PIK3R3	SH2	pY1346	0.587	Koytiger et al, 2013 Mol & Cell Proteomics
PLCG2	SH2	pY1166	1.597	Gordus et al, 2009 Mol Sys Biol
PLCG2	SH2	pY1346	0.6624	Koytiger et al, 2013 Mol & Cell Proteomics
RASA1	SH2	pY1161	1.225	Gordus et al, 2009 Mol Sys Biol
RASA1	SH2	pY1346	0.491	Koytiger et al, 2013 Mol & Cell Proteomics
SHC1	PTB	pY980	0.956	Koytiger et al, 2013 Mol & Cell Proteomics
SRC	SH2	pY1161	0.8938	Koytiger et al, 2013 Mol & Cell Proteomics
SRC	SH2	pY1165	0.8447	Koytiger et al, 2013 Mol & Cell Proteomics
STAT1	SH2	pY1161	0.8656	Koytiger et al, 2013 Mol & Cell Proteomics
SYK	SH2	pY1161	1.174	Gordus et al, 2009 Mol Sys Biol
VAV2	SH2	pY1161	0.6282	Koytiger et al, 2013 Mol & Cell Proteomics
YES1	SH2	pY1161	0.9673	Koytiger et al, 2013 Mol & Cell Proteomics
YES1	SH2	pY1165	0.8668	Koytiger et al, 2013 Mol & Cell Proteomics
ZAP70	SH2	pY980	0.806	Gordus et al, 2009 Mol Sys Biol
